# Supplementary material
Source: PubMed Central journal article supplement (PMC6127728)
Supplement: joces-131-216895-s1.pdf [file joces-131-216895-s1.pdf]

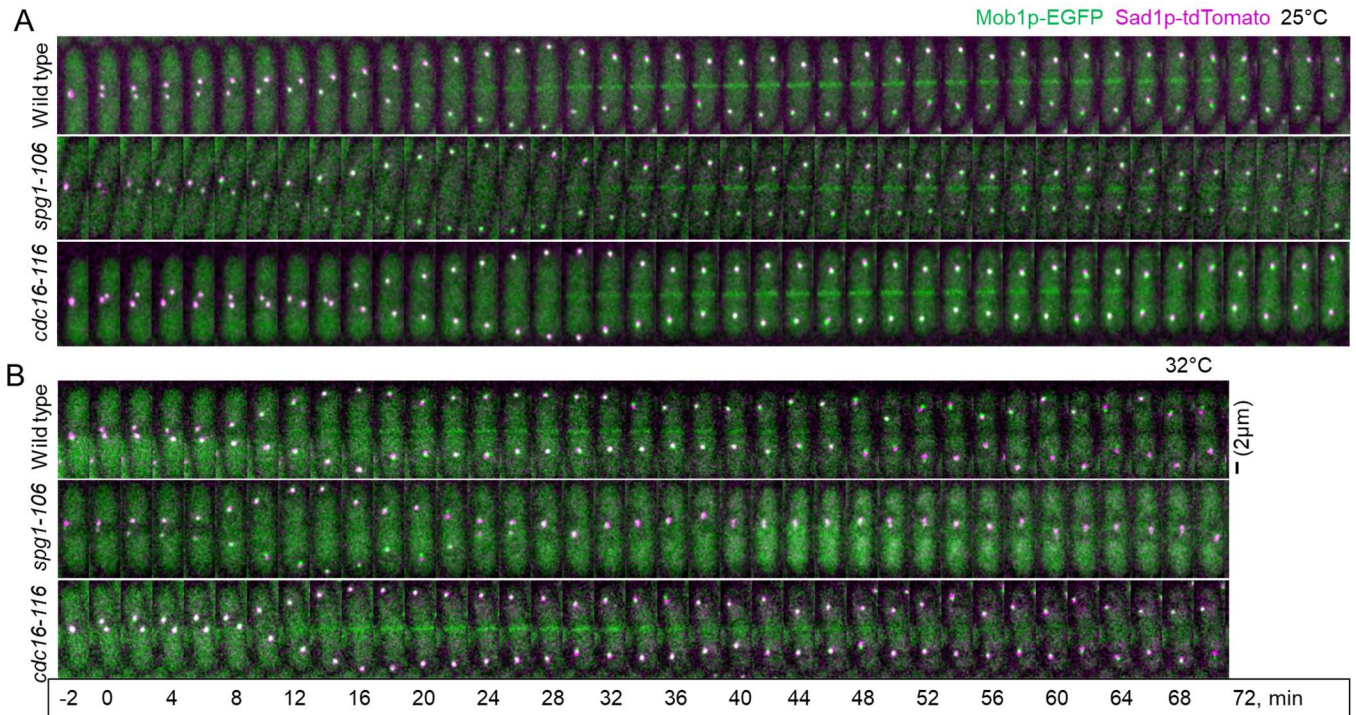

**Supplemental Fig S1: Mob1p localization during mitosis in wild-type, *spg1-106* and *cdc16-116* cells expressing (green) Mob1-EGFP and (magenta) Sad1p-tdTomato.** (A,B) Time series of maximum intensity projections of fluorescence micrographs at (A) 25°C or (B) after shifting to 32°C for 60 min. (Top panels) wild-type cells, (middle panels) *spg1-106* mutant cells and (lower panels) *cdc16-116* mutant cells. Time 0 min is when the SPBs separated in each cell. Scale bar: 2  $\mu$ m.

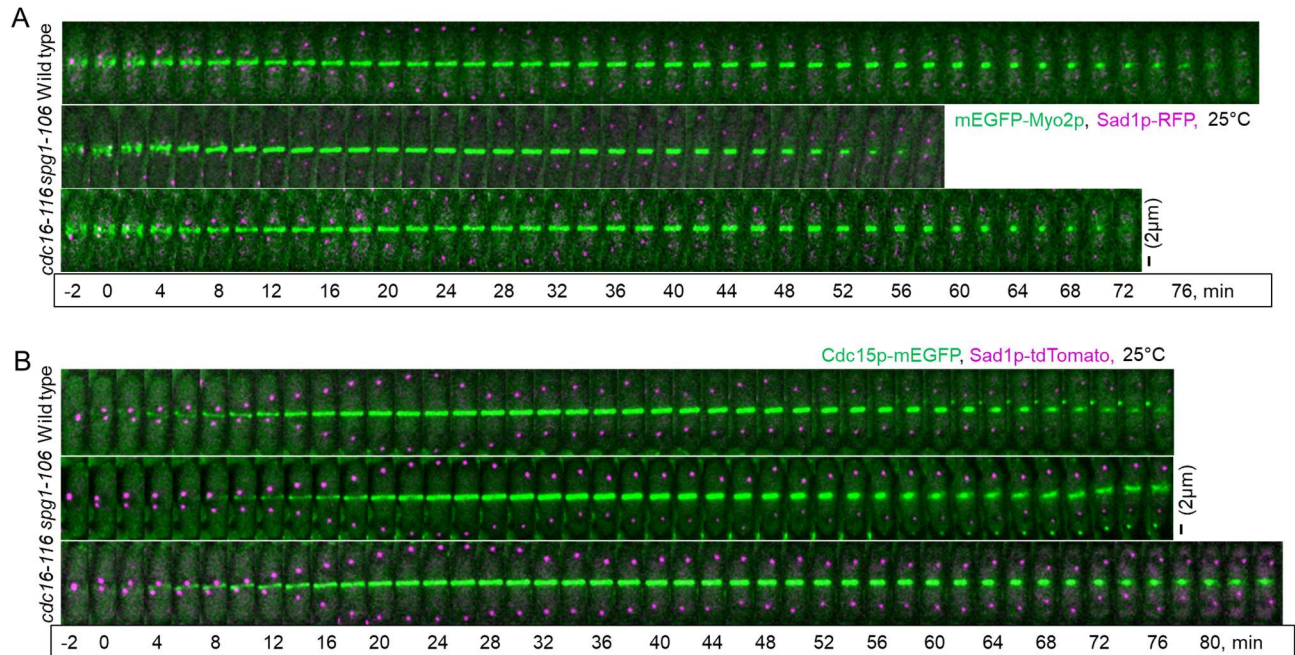

**Supplemental Fig S2: Myo2p and Cdc15p ring assembly at 25°C.** (A,B) Time series of maximum intensity projections of fluorescence micrographs of (top panel) wild-type cells, (middle panel) *spg1-106* mutant cells and (lower panel) *cdc16-116* mutant cells. (A) (green) mEGFP-Myo2p and (magenta) Sad1p-RFP. (B) (green) Cdc15p-GFP and (magenta) Sad1p-tdTomato. Time 0 min is when the SPBs separated in each cell. Scale bar: 2 μm.

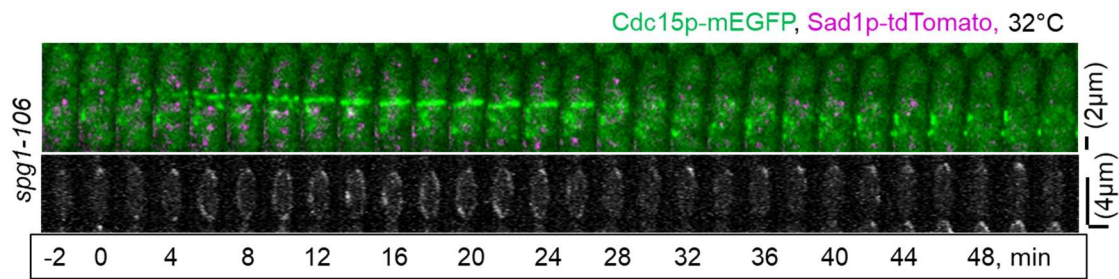

**Supplemental Fig S3: Failure of Cdc15p to form a homogenous contractile ring in a *spg1-106* mutant cell after shifting to 32°C for 60 min.** (Upper row) Time series of maximum intensity projections of fluorescence micrographs of a cell expressing (green) Cdc15p-GFP and (magenta) Sad1p-tdTomato. (Lower row) Grey-scale 3D reconstructions of this ring. Time 0 min is when the SPBs separated. Scale bars: 2 μm (upper panel) and 4 μm (lower panel).

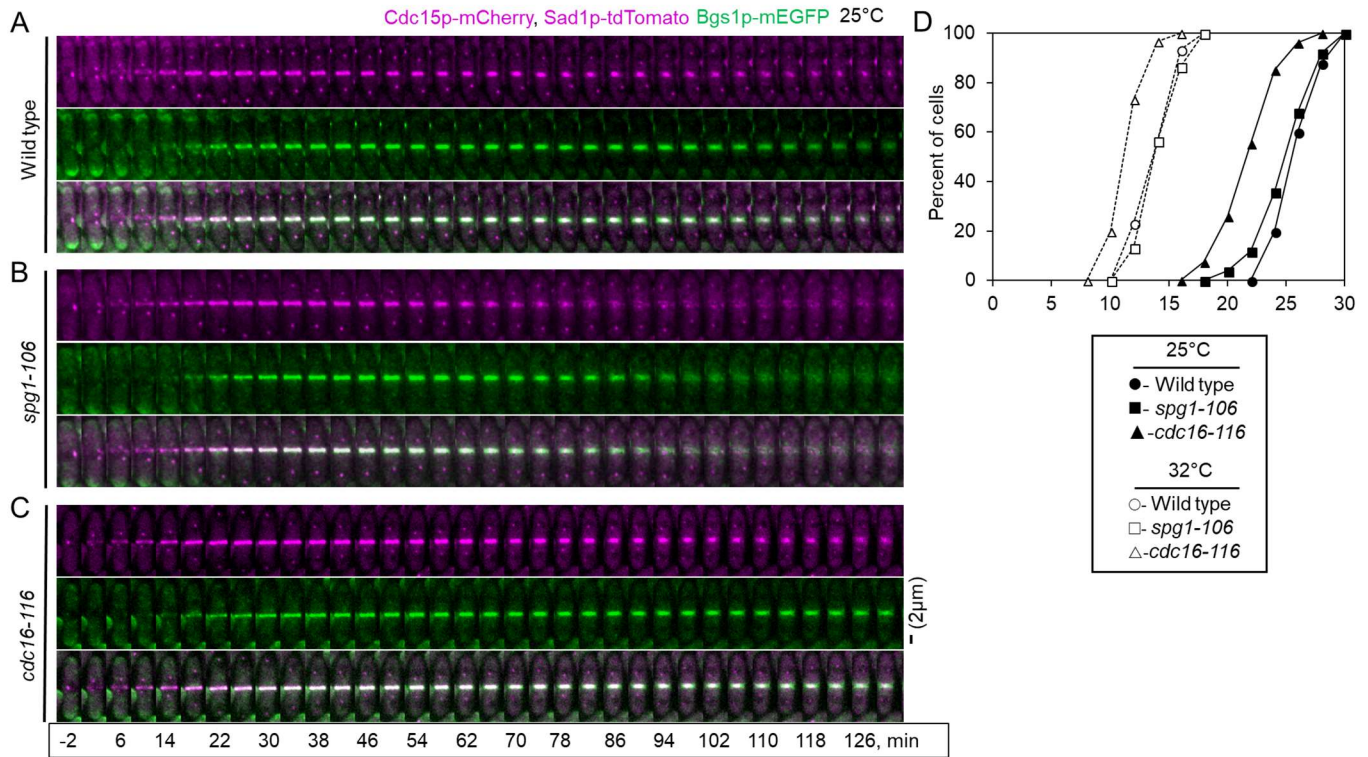

**Supplemental Fig. S4. Bgs1p-mEGFP localization to the contractile ring at 25°C.** (A-C) Time series of maximum intensity projections of fluorescence micrographs of cells expressing (green) Bgs1p-mEGFP and (magenta) Sad1p-tdTomato and Cdc15p-mCherry at 25°C. (A) Wild-type cell. (B) *spg1-106* mutant cell. (C) *cdc16-116* mutant cell. Top panels of A-C (Cdc15p-mCherry and Sad1p-tdTomato), middle panels of A-C (Bgs1p-mEGFP) and lower panels of A-C (Merge). Time 0 min is when the SPBs separated in each cell. Scale bars: 2 µm. (D) Outcome plots of the first appearance of Bgs1p-mEGFP at the division site with time 0 min at SPB separation. Symbols and numbers of cells: (●, n=25, ○, n=30) wild-type cells; (■, n=25, □, n=30) *spg1-106* mutant cells; (▲, n=27, △, n=30) *cdc16-116* mutant cells. Filled symbols and solid lines are at 25°C, and open symbols and dashed lines are observations after 60 min at 32°C.

**Supplemental Table S1.** Ring assembly and constriction times (when rings began to constrict) and Myp2p appearance in minutes after SPB separation measured as the mean times  $\pm$  SD. In each row the data from experiment-1 is the upper line and the data from experiment-2 is the lower line. Onset of ring constriction defined when ring circumference decrease by 0.6  $\mu$ m. SDs came from averaging the end points from  $\sim$ 20 cells.

|                                                                                       | 25°C                                                       |                                                              |                                                              | 32°C                                                       |                                                                                          |                                                                |
|---------------------------------------------------------------------------------------|------------------------------------------------------------|--------------------------------------------------------------|--------------------------------------------------------------|------------------------------------------------------------|------------------------------------------------------------------------------------------|----------------------------------------------------------------|
| Marker                                                                                | Wild type                                                  | <i>spg1-106</i>                                              | <i>cdc16-116</i>                                             | Wild type                                                  | <i>spg1-106</i>                                                                          | <i>cdc16-116</i>                                               |
| <b>Times of ring assembly (minutes after SPB separation)</b>                          |                                                            |                                                              |                                                              |                                                            |                                                                                          |                                                                |
| Mid1p-mEGFP                                                                           | 12.0 $\pm$ 1.5<br>---                                      | 13.1 $\pm$ 1.8 <sup>#</sup><br>---                           | 12.7 $\pm$ 1.8 <sup>#</sup><br>---                           | 8.3 $\pm$ 0.7 <sup>#</sup><br>---                          | 11.4 $\pm$ 1.6 <sup>*,#</sup> (34% failed)<br>---                                        | 5.1 $\pm$ 1.3 <sup>*,#</sup><br>---                            |
| mEGFP-Myo2p                                                                           | 12.7 $\pm$ 1.7<br>13.4 $\pm$ 1.8                           | 16.6 $\pm$ 2 <sup>*</sup><br>13.3 $\pm$ 1.7                  | 15.5 $\pm$ 1.8 <sup>*</sup><br>13.4 $\pm$ 1.7                | 10.3 $\pm$ 1.8<br>10.7 $\pm$ 1.7                           | 14.5 $\pm$ 2.2 <sup>*</sup><br>13.1 $\pm$ 1.8 <sup>*</sup>                               | 11.3 $\pm$ 1.8<br>9.3 $\pm$ 1.6 <sup>*</sup>                   |
| mEGFP-Rng2p                                                                           | 12.6 $\pm$ 1.4<br>11.6 $\pm$ 1.5 <sup>†</sup>              | 11.7 $\pm$ 0.8 <sup>#</sup><br>11.6 $\pm$ 1.5 <sup>†</sup>   | 13.8 $\pm$ 1.4 <sup>*,#</sup><br>11.5 $\pm$ 1.4 <sup>†</sup> | 9 $\pm$ 1.3<br>9.6 $\pm$ 1.4                               | 14.6 $\pm$ 3.3 <sup>*</sup> (26% failed)<br>13.5 $\pm$ 1.8 <sup>*</sup> (17% failed)     | 8.0 $\pm$ 1.1 <sup>#</sup><br>9.3 $\pm$ 1.4                    |
| Cdc12p-3GFP                                                                           | 16.8 $\pm$ 3<br>16 $\pm$ 2.5 <sup>†</sup>                  | 19.7 $\pm$ 2.9 <sup>*,#</sup><br>15.3 $\pm$ 1.9 <sup>†</sup> | 18.7 $\pm$ 2.6 <sup>#</sup><br>15.6 $\pm$ 1.8 <sup>†</sup>   | 13.5 $\pm$ 2.1 <sup>#</sup><br>11.6 $\pm$ 1.8              | 16.3 $\pm$ 2.7 <sup>*,#</sup> (30% failed)<br>16.2 $\pm$ 2.7 <sup>†,*</sup> (30% failed) | 13.2 $\pm$ 1.4 <sup>#</sup><br>9.2 $\pm$ 1.4 <sup>*</sup>      |
| Cdc15p-GFP                                                                            | 17.1 $\pm$ 2.3 <sup>#</sup><br>15.7 $\pm$ 1.5 <sup>†</sup> | 18.0 $\pm$ 1.8 <sup>#</sup><br>16.0 $\pm$ 1.6 <sup>†</sup>   | 17.7 $\pm$ 2.1 <sup>#</sup><br>15.7 $\pm$ 1.4 <sup>†</sup>   | 12.7 $\pm$ 1.4 <sup>#</sup><br>11.2 $\pm$ 1.6              | 16.5 $\pm$ 2.2 <sup>*,#</sup> (50% failed)<br>14.8 $\pm$ 2 <sup>†,*</sup> (20% failed)   | 12.4 $\pm$ 1.5<br>10.4 $\pm$ 1.5 <sup>†</sup>                  |
| <b>Times of Myp2p appearance in fully formed rings (minutes after SPB separation)</b> |                                                            |                                                              |                                                              |                                                            |                                                                                          |                                                                |
| Myp2p-GFP                                                                             | 22.9 $\pm$ 1.9<br>---                                      | 23.7 $\pm$ 2.4<br>---                                        | 25.3 $\pm$ 2.4<br>---                                        | 14.5 $\pm$ 1.9<br>---                                      | 15.8 $\pm$ 1.3<br>---                                                                    | 15.6 $\pm$ 1.7<br>---                                          |
| <b>Times of ring constriction (minutes after SPB separation)</b>                      |                                                            |                                                              |                                                              |                                                            |                                                                                          |                                                                |
| mEGFP-Myo2p                                                                           | 28.6 $\pm$ 3.1<br>33.5 $\pm$ 3                             | 26.5 $\pm$ 2.2 <sup>*</sup><br>32.4 $\pm$ 3.7                | 29.6 $\pm$ 1.5<br>31.8 $\pm$ 2.8                             | 16.6 $\pm$ 2.1<br>20.9 $\pm$ 2.3                           | 18.4 $\pm$ 0.8 <sup>*</sup> (80% failed)<br>20.4 $\pm$ 1.8 (30% failed)                  | 16.2 $\pm$ 1.7<br>19 $\pm$ 2.7 <sup>*</sup>                    |
| mEGFP-Rng2p                                                                           | 31.2 $\pm$ 3 <sup>#</sup><br>27.9 $\pm$ 2.2 <sup>†</sup>   | 26.2 $\pm$ 2.9 <sup>*</sup><br>27.0 $\pm$ 3 <sup>†</sup>     | 30.4 $\pm$ 2.3<br>23.5 $\pm$ 1.9 <sup>†,*</sup>              | 19.8 $\pm$ 3.1 <sup>#</sup><br>19.8 $\pm$ 3.1              | 16.6 $\pm$ 1.8 <sup>*,#</sup> (24% failed)<br>21.2 $\pm$ 2 <sup>*</sup> (45% failed)     | 21.6 $\pm$ 2.4 <sup>*,#</sup><br>16.1 $\pm$ 2.1 <sup>†,*</sup> |
| Cdc12p-3GFP                                                                           | 32 $\pm$ 2.6 <sup>#</sup><br>31.3 $\pm$ 1.8 <sup>†</sup>   | 30.7 $\pm$ 2 <sup>#</sup><br>28.2 $\pm$ 2.6 <sup>†</sup>     | 33.6 $\pm$ 3.2 <sup>#</sup><br>27.8 $\pm$ 2.6 <sup>†</sup>   | 19.0 $\pm$ 2 <sup>#</sup><br>18.7 $\pm$ 2 <sup>†</sup>     | 21.3 $\pm$ 1 <sup>*,#</sup> (58% failed)<br>21.3 $\pm$ 1 <sup>*</sup> (57% failed)       | 17.4 $\pm$ 1.3 <sup>*</sup><br>15.7 $\pm$ 1.7 <sup>†,*</sup>   |
| Cdc15p-GFP                                                                            | 42.3 $\pm$ 3.7 <sup>#</sup><br>38.7 $\pm$ 4.1 <sup>†</sup> | 43.3 $\pm$ 3.3 <sup>#</sup><br>37.0 $\pm$ 3.3 <sup>†</sup>   | 39.9 $\pm$ 2.8 <sup>*,#</sup><br>39.9 $\pm$ 2.8 <sup>†</sup> | 26.9 $\pm$ 2.8 <sup>#</sup><br>23.4 $\pm$ 1.8 <sup>†</sup> | 20.0 <sup>*,#</sup> (91% failed)<br>22.0 <sup>*</sup> (95% failed)                       | 26.6 $\pm$ 3 <sup>#</sup><br>24.9 $\pm$ 2.7 <sup>†</sup>       |
| Myp2p-GFP                                                                             | 30.7 $\pm$ 2.7 <sup>#</sup><br>---                         | 31.2 $\pm$ 3.1 <sup>#</sup><br>---                           | 33.7 $\pm$ 3.6 <sup>#</sup><br>---                           | 20.4 $\pm$ 2.5 <sup>#</sup><br>---                         | 20.5 $\pm$ 3 <sup>#</sup> (28% failed)<br>---                                            | 21.4 $\pm$ 2.1 <sup>#</sup><br>---                             |

\* Significant differences (p <0.05) by log-rank tests from wild-type cells at the same temperature.

# Significant difference (p <0.05) by Student's T-test from Myo2p marker in the same column from experiment-1. † Significant difference (p <0.05) by Student's T-test from Myo2p marker in the same column from experiment-2.

**Supplemental Table S2:** Maturation times (interval between completion of ring assembly and ring constriction) in minutes after SPB separation measured as the mean times  $\pm$  SD. SDs came from averaging the end points from  $\sim$ 20 cells. In each row the data from experiment-1 is the upper line and the data from experiment-2 is the lower line. The data for Mid1p-mEGFP is from experiment-1.

|                                                                  | 25°C             |                    |                    | 32°C             |                              |                   |
|------------------------------------------------------------------|------------------|--------------------|--------------------|------------------|------------------------------|-------------------|
| Marker                                                           | Wild type        | <i>spg1-106</i>    | <i>cdc16-116</i>   | Wild type        | <i>spg1-106</i>              | <i>cdc16-116</i>  |
| <b>Ring maturation times (between assembly and constriction)</b> |                  |                    |                    |                  |                              |                   |
| mEGFP-Myo2p                                                      | 15.8 $\pm$ 3.9   | 9.9 $\pm$ 2.6 *    | 14.2 $\pm$ 1.8     | 6.3 $\pm$ 2.5    | 4.2 $\pm$ 1.9 * (80% failed) | 4.9 $\pm$ 2.2     |
|                                                                  | 20.1 $\pm$ 2.8   | 19 $\pm$ 3.7       | 18.4 $\pm$ 2.8     | 10.2 $\pm$ 2.3   | 8 $\pm$ 2 (30% failed)       | 9.7 $\pm$ 2.5     |
| mEGFP-Rng2p                                                      | 18.5 $\pm$ 4 #   | 14.5 $\pm$ 3.3 *,# | 16.5 $\pm$ 2.5 *,# | 7.5 $\pm$ 1.8    | 7.5 $\pm$ 2.4 # (24% failed) | 7.5 $\pm$ 1.8 #   |
|                                                                  | 16.3 $\pm$ 2.3 † | 15.3 $\pm$ 3 †     | 16.3 $\pm$ 2.3 †   | 10.2 $\pm$ 2.3   | 8.3 $\pm$ 2.1 (45% failed)   | 6.8 $\pm$ 2.4 †,* |
| Cdc12-3GFP                                                       | 15.2 $\pm$ 2.7   | 11 $\pm$ 3.1 *     | 14.9 $\pm$ 4.2     | 5.5 $\pm$ 2.1    | 5.3 $\pm$ 2 (58% failed)     | 4.1 $\pm$ 0.5     |
|                                                                  | 15.3 $\pm$ 2 †   | 12.9 $\pm$ 1.4 †,* | 12 $\pm$ 2.7 †,*   | 7.1 $\pm$ 1.6 †  | 6 $\pm$ 1.7 (57% failed)     | 6.5 $\pm$ 1.3 †   |
| Cdc15-GFP                                                        | 25.4 $\pm$ 4.4 # | 26 $\pm$ 3.8 #     | 21.2 $\pm$ 2.6 *,# | 14.1 $\pm$ 2.8 # | 6 *,# (91% failed)           | 14.6 $\pm$ 2.5 #  |
|                                                                  | 22.4 $\pm$ 3.9 † | 21 $\pm$ 3.1       | 24.2 $\pm$ 3.3 †   | 12.2 $\pm$ 2.5 † | 10 * (95% failed)            | 14.5 $\pm$ 2.5 †  |
| <b>Mid1p disappearance from rings</b>                            |                  |                    |                    |                  |                              |                   |
| Mid1p-mEGFP                                                      | 23.1 $\pm$ 1.9   | 22.1 $\pm$ 2.3     | 23.1 $\pm$ 1.7     | 12.4 $\pm$ 1.4   | 13 $\pm$ 1.1                 | 9.2 $\pm$ 1.8 *   |
|                                                                  | ---              | ---                | ---                | ---              | ---                          | ---               |

\*Significant differences ( $p < 0.05$ ) by log-rank tests from wild-type cells at the same temperature.

# Significant difference ( $p < 0.05$ ) by Student's T-test from Myo2p marker in the same column from experiment-1. † Significant difference ( $p < 0.05$ ) by Student's T-test from Myo2p marker in the same column from experiment-2.

**Supplemental Table S3.** Ring constriction rates in  $\mu\text{m}/\text{min} \pm \text{SD}$ , measured from the linear part of the slopes in the graphs. SDs came from averaging the constriction rates from  $\sim 15$  cells. The data for Myp2p-GFP come from experiment-1.

| Marker      | 25°C                      |                             |                             | 32°C                      |                                             |                           |
|-------------|---------------------------|-----------------------------|-----------------------------|---------------------------|---------------------------------------------|---------------------------|
|             | Wild type                 | <i>spg1-106</i>             | <i>cdc16-116</i>            | Wild type                 | <i>spg1-106</i>                             | <i>cdc16-116</i>          |
| mEGFP-Myo2p | $0.25 \pm 0.06$           | $0.25 \pm 0.03$             | $0.26 \pm 0.04$             | $0.48 \pm 0.06$           | $0.29 \pm 0.06^*$<br>(partial constriction) | $0.43 \pm 0.04^*$         |
| mEGFP-Rng2p | $0.28 \pm 0.02$           | $0.31 \pm 0.03^{\dagger,*}$ | $0.31 \pm 0.04^{\dagger,*}$ | $0.44 \pm 0.06$           | $0.31 \pm 0.10^*$<br>(partial constriction) | $0.48 \pm 0.05^{\dagger}$ |
| Cdc12p-3GFP | $0.27 \pm 0.03$           | $0.28 \pm 0.06$             | $0.30 \pm 0.03^{\dagger,*}$ | $0.51 \pm 0.07$           | $0.31 \pm 0.09^*$<br>(partial constriction) | $0.50 \pm 0.1^{\dagger}$  |
| Cdc15p-GFP  | $0.30 \pm 0.04^{\dagger}$ | $0.30 \pm 0.03^{\dagger}$   | $0.26 \pm 0.02^*$           | $0.37 \pm 0.09^{\dagger}$ | $0.30^*$<br>(partial constriction)          | $0.45 \pm 0.07^*$         |
| Myp2p-GFP   | $0.29 \pm 0.03$           | $0.29 \pm 0.02$             | $0.28 \pm 0.03$             | $0.51 \pm 0.06$           | $0.29 \pm 0.13^*$<br>(partial constriction) | $0.48 \pm 0.05$           |

\*Significant differences ( $p < 0.05$ ) by Student's T-test from wild-type cells at the same temperature.  $^{\dagger}$ Significant difference ( $p < 0.05$ ) by Student's T-test from Myo2p marker in the same column from experiment-2.

**Supplemental Table S4: Strain list**

| Strain | Genotype                                                                                                         | Source     |
|--------|------------------------------------------------------------------------------------------------------------------|------------|
| CL181  | h+ KanMX6-Pmyo2p-mEGFP-Myo2p Sad1p-RFP-KanMX6 ade6-M216 his3-D1 leu1-32 ura4-D18                                 | Lab stock  |
| IRT69  | h- KanMX6-Prng2p-mEGFP-Rng2p Sad1p-RFP-KanMX6 ade6-M21X leu1-32 ura4-D18                                         | Lab stock  |
| SD8    | h+ KanMX6-Pmyo2p-mEGFP-Myo2p Sad1p-RFP-kanMX6 <i>cdc16-116</i> ade6-M216 leu1-32 ura4-D18                        | This study |
| SD21   | h+ KanMX6-Pmyo2p-mEGFP-Myo2p Sad1p-RFP-KanMX6 <i>spg1-106</i> ade6-M210 his3-D1 leu1-32 ura4-D18                 | This study |
| SD23   | h- Cdc7p-EGFP-KanMX6 Sad1p-tdTomato-NatMX6 ade6-M210 leu1-32 ura4-D18                                            | This study |
| SD24   | h+ Mob1p-EGFP-KanMX6 Sad1p-tdTomato-NatMX6 ade6-M210 leu1-32 ura4-D18                                            | This study |
| SD25   | Cdc7p-EGFP-KanMX6 Sad1p-tdTomato-NatMX6 <i>spg1-106</i> ade6-M210 leu1-32 ura4-D18                               | This study |
| SD27   | Cdc7p-EGFP-KanMX6 Sad1p-tdTomato-NatMX6 <i>cdc16-116</i> ade6-M210 leu1-32 ura4-D18                              | This study |
| SD31   | h+ Myp2p-GFP-KanMX6 Sad1p-tdTomato-NatMX6 ade6-M210 leu1-32 ura4-D18                                             | This study |
| SD34   | Myp2p-GFP-KanMX6 Sad1p-tdTomato-NatMX6 <i>cdc16-116</i> ade6-M210 leu1-32 ura4-D18                               | This study |
| SD35   | Myp2p-GFP-KanMX6 Sad1p-tdTomato-NatMX6 <i>spg1-106</i> ade6-M210 leu1-32 ura4-D18                                | This study |
| SD37   | KanMX6-Prng2p-mEGFP-Rng2p Sad1p-RFP-KanMX6 <i>cdc16-116</i> ade6-M21X leu1-32 ura4-D18                           | This study |
| SD38   | KanMX6-Prng2p-mEGFP-Rng2p Sad1-RFP-KanMX6 <i>spg1-106</i> ade6-M21X leu1-32 ura4-D18                             | This study |
| SD40   | h- Cdc12p-3GFP-KanMX6 Sad1p-tdTomato-NatMX6 ade6-M210 leu1-32 ura4-D18                                           | This study |
| SD41   | h- Cdc15p-GFP-KanMX6 Sad1p-tdTomato-NatMX6 ade6-M210 leu1-32 ura4-D18                                            | This study |
| SD42   | h- Cdc12p-3GFP-KanMX6 Sad1p-tdTomato-NatMX6 <i>cdc16-116</i> ade6-M210 leu1-32 ura4-D18                          | This study |
| SD43   | h+ Cdc12p-3GFP-KanMX6 Sad1p-tdTomato-NatMX6 <i>spg1-106</i> ade6-M210 leu1-32 ura4-D18                           | This study |
| SD44   | Cdc15p-GFP-KanMX6 Sad1p-tdTomato-NatMX6 <i>cdc16-116</i> ade6-M210 leu1-32 ura4-D18                              | This study |
| SD45   | Cdc15p-GFP-KanMX6 Sad1p-tdTomato-NatMX6 <i>spg1-106</i> ade6-M210 leu1-32 ura4-D18                               | This study |
| SD46   | h- Mid1p-mEGFP-KanMX6 Sad1p-tdTomato-NatMX6 ade6-M210 leu1-32 ura4-D18                                           | This study |
| SD47   | Mid1p-mEGFP-KanMX6 Sad1p-tdTomato-NatMX6 <i>spg1-106</i> ade6-M210 leu1-32 ura4-D18                              | This study |
| SD48   | Mid1p-mEGFP-KanMX6 Sad1p-tdTomato-NatMX6 <i>cdc16-116</i> ade6-M210 leu1-32 ura4-D18                             | This study |
| SD82   | Cdc15p-GFP-KanMX6 Rlc1p-tdTomato-NatMX6 Sad1p-tdTomato-NatMX6 <i>spg1-106</i> ade6-M210 leu1-32 ura4-D18         | This Study |
| SD83   | h- KanMX6:Pbgs1-mEGFP-Bgs1p Cdc15p-mCherry-KanMx6 Sad1p-tdTomato-NatMX6 ade6-M21x leu1-32 ura4-Δ18               | This Study |
| SD85   | KanMX6:Pbgs1-mEGFP-Bgs1p Cdc15p-mCherry-KanMx6 Sad1p-tdTomato-NatMX6 <i>spg1-106</i> ade6-M21x leu1-32 ura4-Δ18  | This Study |
| SD86   | KanMX6:Pbgs1-mEGFP-Bgs1p Cdc15p-mCherry-KanMx6 Sad1p-tdTomato-NatMX6 <i>cdc16-116</i> ade6-M21x leu1-32 ura4-Δ18 | This Study |
| SD91   | Mob1p-EGFP-KanMX6 Sad1p-tdTomato-NatMX6 <i>spg1-106</i> ade6-M210 leu1-32 ura4-D18                               | This Study |
| SD92   | Mob1p-EGFP-KanMX6 Sad1p-tdTomato-NatMX6 <i>cdc16-116</i> ade6-M210 leu1-32 ura4-D18                              | This Study |
